# Supplementary material for: Nanodroplet processing platform for deep and quantitative proteome profiling of 10–100 mammalian cells
Source: PubMed Central journal article supplement (PMC5830451; doi:10.1038/s41467-018-03367-w), 2018-02-28
Supplement: 41467_2018_3367_MOESM3_ESM.pdf [file 41467_2018_3367_MOESM3_ESM.pdf]

**Description of Additional Supplementary Files:**

File Name: Supplementary Data 1

Description: Supplementary Data 1 contains three excel spreadsheets: 1) List of significant proteins between T1D and control islets identified with imputation of missing data; 2) List of significant proteins identified without imputation of missing data; 3) Significant proteins common to both analyses.
